# Supplementary material for: Incorporating local ancestry improves identification of ancestry-associated methylation signatures and meQTLs in African Americans
Source: PubMed Central journal article supplement (PMC9054854; doi:10.1038/s42003-022-03353-5), 2022-04-29
Supplement: 42003_2022_3353_MOESM2_ESM.pdf [file 42003_2022_3353_MOESM2_ESM.pdf]

## Description of Additional Supplementary Files

**File name:** Supplementary Data 1

**Description:** Epigenome-wide significant methylation sites ( $p\text{-value} < 1.16e-7$ ) associated with self-reported race in the Veterans Aging Cohort Study (VACS) discovery group (N=527) and replications in the VACS replication group (N=467) and Women's Interagency HIV Study (WIHS) replication cohort (N=230)

**File name:** Supplementary Data 2

**Description:** Epigenome-wide significant methylation sites ( $p\text{-value} < 1.16e-7$ ) associated with global ancestry in the Veterans Aging Cohort Study (VACS) discovery group (N=478) and replications in the VACS replication group (N=422) and Women's Interagency HIV Study (WIHS) replication cohort (N=131)

**File name:** Supplementary Data 3

**Description:** Epigenome-wide significant methylation sites ( $p\text{-value} < 1.16e-7$ ) associated with local ancestry in the Veterans Aging Cohort Study (VACS) discovery group (N=478) and replications in the VACS replication group (N=422) and Women's Interagency HIV Study (WIHS) replication cohort (N=131)

**File name:** Supplementary Data 4

**Description:** The SNP-based heritability estimates of local ancestry-associated DNA methylation (mean  $h^2=0.45$ , median  $h^2=0.43$ ) and the overall heritability (mean  $h^2=0.06$ , median  $h^2=0.01$ ) estimated from all methylation sites

**File name:** Supplementary Data 5

**Description:** The trait enrichment of the differentially methylated CpG sites identified in the EWAS of local ancestry, global ancestry, and self-reported race

**File name:** Supplementary Data 6

**Description:** Methylation quantitative trait loci (meQTL) identified from the conventional model for local ancestry associated DNA methylation in the Veterans Aging Cohort Study (VACS) discovery group (N=478)

**File name:** Supplementary Data 7

**Description:** Methylation quantitative trait loci (meQTL) identified from the ancestry model for local ancestry associated DNA methylation in the Veterans Aging Cohort Study (VACS) discovery group (N=478), and replications in the VACS replication group (N=422) and Women's Interagency HIV Study (WIHS) replication cohort (N=131)

**File name:** Supplementary Data 8

**Description:** Methylation quantitative trait loci (meQTL) with genetic effects significantly differed by ancestry for local ancestry associated DNA methylation in the Veterans Aging Cohort Study (VACS) discovery group (N=478), and replications in the VACS replication group (N=422) and Women's Interagency HIV Study (WIHS) replication cohort (N=131)

**File name:** Supplementary Data 9

**Description:** meQTL rs9370878 of CpG site cg20133046: the genetic effects on the methylations are opposite for the African and European ancestry

**File name:** Supplementary Data 10

**Description:** meQTL rs1552489 of CpG site cg08033130: the genetic effects from the two ancestries contribute to the methylation in the same direction but with different effect sizes

**File name:** Supplementary Data 11

**Description:** meQTL rs2955229 of CpG site cg24599650: the African alleles are associated with differential methylations while the European alleles are not

**File name:** Supplementary Data 12

**Description:** meQTL rs4074196 of CpG site cg23611477: the European alleles are associated with differential methylations while the African alleles are not

**File name:** Supplementary Data 13

**Description:** meQTL rs6774733 of CpG site cg02527881: the genetic effects are comparable between ancestries
